# Supplementary material for: Trophic transfer of essential elements in the clownfish Amphiprion ocellaris in the context of ocean acidification
Source: PLoS One. 2017 Apr 11;12(4):e0174344. doi: 10.1371/journal.pone.0174344 (PMC5388329; doi:10.1371/journal.pone.0174344)
Supplement: S1 File — Data used for (1) kinetics of stomach pH in juvenile clownfish after a single feeding, (2) long-term depuration of 57Co, 54Mn, and 65Zn in juvenile clownfish and (3) short-term (hourly) depuration of 57Co, 54Mn and 65Zn in juvenile clownfish. (XLSX) [file pone.0174344.s002.xlsx]

## Sheet: (A) Stomach pH
Supporting information A - Kinetics of stomach pH in juvenile clownfish
for "Trophic transfer of essential elements in the clownfish Amphiprion ocellaris in the context of ocean acidification" Hugo Jacob, Simon Pouil, David Lecchini, François Oberhänsli, Peter Swarzenski, and Marc Metian
KINETIC OF STOMACH PH (1 individual per measurement; no unit)
Acidified condition (pH 7.5)		Control condition (pH 8.0)
Time after feeding (h)	Stomach pH	Time after feeding (h)	Stomach pH
-0.733333	6.63	-0.666667	7.16
-0.516667	7.21	-0.466667	7
-0.333333	7.13	-0.35	7.24
0.383333	5.95	0.316667	5.84
0.516667	5.72	0.466667	6.02
0.683333	5.75	0.6	5.89
0.933333	5.75	0.833333	5.73
1.08333	5.48	0.983333	5.6
1.2	5.75	1.08333	4.95
1.93333	5.52	1.86667	5.3
2.08333	4	2.08333	5.65
2.21667	4.98	2.23333	5.47
2.93333	4.96	2.73333	5
3.13333	5.12	2.88333	4.96
3.25	4.5	3.03333	4.92
3.95	5.2	3.9	4.28
4.16667	4.09	4.08333	4.83
4.3	4.49	4.23333	4.62
5.93333	3.5	5.83333	4
6.11667	3.82	6	3.94
6.28333	3.96	6.11667	3.55
7.93333	5.15	7.68333	4.55
8.23333	3.9	7.85	4.54
8.36667	5.12	7.96667	4.4

## Sheet: (B) Long-term depuration
Supporting information B - Long-term depuration of 57Co, 54Mn, and 65Zn in juvenile clownfish
for "Trophic transfer of essential elements in the clownfish Amphiprion ocellaris in the context of ocean acidification" Hugo Jacob, Simon Pouil, David Lecchini, François Oberhänsli, Peter Swarzenski, and Marc Metian
Depuration of radiotracers was expressed as the percentage of remaining radioactivity, which corresponds to radioactivity at time t divided by the initial radioactivity measured in the organism at the beginning of the depuration period. For this specific experiment, radioactivity at time t and at time 0 was divided by the average of initial radioactivity measured in all the organism at time 0 (be…
	LONG-TERM DEPURATION (Remaining activities per individual; %)
Depuration (d)	Acidified condition (pH 7.5)			Control condition (pH 8.0)
	Mn	Co	Zn	Mn	Co	Zn
0	99.7374	119.686	106.055	117.788	119.686	118.811
0	41.2339	46.3566	39.6143	106.546	46.3566	105.036
0	209.694	268.995	195.264	51.3722	268.995	53.1017
0	86.289	102.612	88.295	60.4257	102.612	66.4355
0	195.15	25.1484	195.873	83.4856	25.1484	81.4814
0	103.707	127.955	102.876	164.668	127.955	169.733
0	135.906	164.413	136.976	113.387	164.413	113.545
0	59.0071	58.2012	62.4831	147.113	58.2012	152.846
0	69.9376	65.984	73.5453	95.9486	65.984	95.9307
0	140.793	159.986	150.372	117.05	159.986	102.831
0	47.1286	46.235	45.5345	121.128	46.235	130.303
0	75.862	83.6414	68.6739	72.3819	83.6414	71.5978
0	92.2134	104.923	87.3139	102.076	104.923	91.2613
0	95.2052	87.2653	100.406	110.139	87.2653	114.297
0	48.1358	38.5981	46.7185	36.4904	38.5981	32.7897
1	4.44627	5.80309	26.8911	8.75401	2.9737	44.2817
1	8.36822	4.81321	37.5846	7.71044	3.80228	38.4709
1	2.95657	1.25985	10.0744	2.52023	3.00318	14.1276
1	2.18492	0.839089	9.86806	7.63672	4.7029	42.5955
1	12.8382	12.0586	86.2991	5.93891	3.6025	27.4977
1	6.66792	3.68713	30.0913	6.19001	2.21881	35.747
1	4.7099	2.85777	20.5007	12.7555	7.13459	60.4431
1	2.66391	1.67575	14.2219	8.28176	4.17726	37.4591
1	3.19029	1.42961	17.9364	0.696405	1.06863	10.7241
1	13.1551	6.28952	45.839	2.8128	2.22864	14.5971
1	6.44279	4.73052	40.1556	6.81891	4.29353	34.1127
1	6.27987	3.34663	32.1989	5.88131	2.9475	25.6429
1	22.3557	12.1242	73.1732	8.87611	4.58173	41.947
1	4.70694	2.97208	32.6759	1.16981	0.872788	12.4051
1	4.63881	4.76214	32.8687
2	6.51388	3.37825	28.136	6.1854	3.19149	28.7429
2	11.0105	5.12696	54.7361	12.3063	6.2487	60.4431
2	3.06588	1.62321	8.30176	2.63772	1.28167	15.7152
2	5.33789	2.52456	16.6407	6.06561	1.29526	18.4935
2	3.53391	1.40383	16.6813	5.27314	1.37566	18.4105
2	6.42502	2.37547	25.4432	6.22226	2.62	22.351
2	7.28998	3.01586	35.5548	8.15275	2.58561	42.6993
2	16.5735	7.21374	71.6171	12.1358	4.56372	40.8056
2	3.09846	1.50793	16.8065	1.75956	1.35814	13.3597
2	11.6652	3.94737	40.2909	5.3722	1.31049	22.2057
2	9.48201	5.11966	44.6888
2	3.32655	3.84522	36.0284	4.32633	4.85192	36.655
2	4.01971	17.6695	25.3518	9.86439	4.03971	39.6901
2	3.36802	1.06649	10.5074	1.44257	0.48077	6.72656
2	2.79662	3.39041	20.9574	7.66437	3.62215	38.1077
2				8.50752	2.92294	38.4968
3	4.0908	1.35738	12.9973	7.10227	2.12875	32.7638
3	10.4951	3.602	55.6157	9.18711	3.5632	42.5696
3	3.31767	0.959967	7.47632	2.72987	1.47244	13.4038
3	2.97998	1.78325	22.6861	1.26588	0.579348	8.7422
3	16.0759	3.89629	46.8539	3.64904	1.44673	18.0836
3	4.48181	2.5951	21.7185	8.88763	1.71119	37.1219
3	4.48181	2.28913	20.6495	7.19442	1.97155	22.5248
3	2.88074	0.922512	14.8444	1.87543	0.751449	12.0679
3	2.83512	1.2168	14.3742	11.2374	3.05721	32.9194
3	10.2551	2.26189	28.9919	5.8721	1.80125	21.526
3	8.62297	3.27123	32.4932
3	8.4956	2.4049	27.6319	4.26413	1.87166	27.2902
3	6.44871	2.09456	26.7862	4.69031	2.18606	24.9503
3	3.40061	1.45929	25.5785	4.65345	1.47391	15.0485
3	1.88366	0.528505	5.39919	4.91837	1.22092	20.1901
3				6.38582	1.86839	29.5211
4	10.6965	3.9571	59.134	6.8074	2.26466	30.1956
4	3.35025	1.80343	22.0095	10.3735	3.8645	45.2415
4	2.18166	3.82576	5.78146	2.27305	0.981354	11.3259
4	2.68672	1.31822	9.69215	7.25201	1.87003	33.1529
4	2.15352	0.730859	10.8796	4.20193	1.18997	15.3287
4	2.5703	0.964588	6.73545	5.91817	1.47048	18.6647
4	5.9955	2.7313	24.5196	5.70163	1.86184	22.2602
4	16.4047	3.56552	57.6455	2.81741	1.05832	15.3987
4	2.41005	0.994503	11.5968	7.94081	1.59984	20.2731
4	10.3766	3.44878	35.0812	3.96695	1.98301	25.6377
4	7.83503	2.6486	30.521
4	5.60745	1.63391	18.6333	1.24146	0.840693	8.29082
4	4.00194	2.19501	17.0839	7.12761	1.92406	28.1462
4	3.31767	1.49285	18.3525	2.69762	1.34914	15.6218
4	4.18263	2.17944	21.6441	1.91966	1.14347	10.4439
4				7.1829	1.6375	23.5131
6	3.52798	1.09106	9.63464	4.12821	1.29543	21.2044
6	2.83542	0.926647	15.4432	11.0946	2.13858	27.809
6	1.49058	0.537504	5.59878	1.99177	0.488794	7.82388
6	2.83512	0.575202	14.7395	6.13702	1.37354	36.3177
6	13.4277	2.1612	44.452	4.14203	1.49782	15.7775
6	1.99356	0.503697	7.11434	3.26433	1.497	20.753
6	5.54524	1.96833	23.6401	9.14564	3.17675	36.9144
6	2.15174	0.839819	9.84777	5.56341	1.32195	17.8087
6	2.41686	0.869978	10.3586	3.26893	0.624543	6.9289
6	11.4845	2.81156	33.8633	1.09563	0.624543	6.9289
6	5.89478	2.03838	28.5487
6	6.2384	2.22419	20.3011	6.01723	1.73248	22.9528
6	5.486	1.34668	21.2043	6.71755	1.86675	24.4548
6	11.5704	3.16422	56.8336	1.40686	0.991834	10.5477
6	3.66128	2.19817	18.8024	3.937	1.24434	19.4559
6				6.372	1.51895	29.1839
9	4.66251	0.966777	18.18	5.89744	2.1222	26.8232
9	4.29223	1.57603	15.5176	6.49409	1.46556	27.3421
9	13.6084	2.59023	42.4899	2.08806	0.748338	9.7565
9	8.35637	2.12496	38.5318	6.10938	1.50323	17.129
9	2.33688	0.99499	6.85047	2.95793	1.16475	14.0316
9	3.08069	1.94961	16.7794	1.66211	0.528585	6.17661
9	3.10143	1.35033	17.7233	9.42439	3.5501	40.4164
9	3.07477	0.707267	10.9134	10.3551	1.4505	25.6481
9	2.51758	0.581282	13.0379	1.30573	0.869186	10.4024
9	9.98558	2.90155	29.7158	5.10036	1.44886	17.3599
9	6.9197	2.2113	29.1441
9	3.20214	0.758099	15.5886	3.67669	1.965	21.0928
9	2.12449	1.11879	17.5372	3.80339	1.1546	16.1588
9	3.04514	1.00885	8.26116	4.42078	0.955973	16.0758
9	2.65058	0.664948	7.65223	2.99479	0.842167	12.3065
9				5.33534	1.49782	22.7064
14	2.86001	1.01566	12.138	4.37701	1.32146	18.3171
14	2.62688	0.990855	12.7808	0.694792	0.616519	7.43476
14	2.23972	0.702403	3.83627	1.75311	0.469308	5.96389
14	8.3623	2.13007	38.1935	8.38312	2.04688	30.7144
14	2.1396	0.420518	8.32206	2.95793	0.901117	10.0237
14	3.67313	1.90875	15.4296	3.85177	0.71395	10.2624
14	3.21399	1.09519	16.0115	8.83464	0.932557	20.2394
14	12.7849	1.59257	35.0812	4.45303	1.02999	17.1264
14	1.72548	0.549908	5.73748	5.25241	1.07911	22.4314
14	9.40499	2.22079	23.7686	2.60317	0.872952	14.2054
14	6.25025	2.18139	22.5237
14	2.41597	0.863654	13.9851	3.0593	1.02278	10.3687
14	3.07773	1.16573	11.2111	4.94602	1.42577	17.8061
14	2.92991	1.49115	15.2503	2.64924	0.834143	9.9744
14	1.57885	0.599767	5.79838	0.658164	0.552984	3.84449
14				4.53366	0.844787	15.3935
20	3.76496	0.982829	12.7808	2.58474	0.829885	10.0911
20	1.48131	0.637708	10.6191	5.04738	0.867057	12.8279
20	11.1349	1.67283	29.7429	4.01533	0.874098	12.4881
20	3.30286	0.908162	13.3424	4.4346	0.633549	19.8917
20	2.36976	0.628466	3.75507	2.58934	0.75194	9.08981
20	6.11102	1.27712	2.89716	4.6235	0.525965	12.1664
20	2.52617	1.18932	11.3769	0.960407	0.318821	4.56566
20	2.48855	0.549421	4.86806	2.28295	0.69692	14.0653
20	1.79865	0.576661	6.27199	0.942439	0.506643	6.38154
20	5.77629	1.3924	17.0737	7.4317	1.51141	2.79128
20	5.1335	1.52617	18.931
20	5.10684	1.07403	11.0521	2.82432	0.536282	8.58136
20	2.82535	0.842008	7.80785	8.10207	0.710675	16.8514
20	1.84486	0.323232	10.3687	4.19962	0.602928	13.4946
20	1.67127	0.573743	3.40325
20				3.80108	0.738677	14.5894

## Sheet: (C) Short-term depuration
Supporting information C - Short-term depuration of 57Co, 54Mn, and 65Zn in juvenile clownfish
for "Trophic transfer of essential elements in the clownfish Amphiprion ocellaris in the context of ocean acidification" Hugo Jacob, Simon Pouil, David Lecchini, François Oberhänsli, Peter Swarzenski, and Marc Metian
For this experiment individuals have been identified and depuration of radiotracers was expressed as the percentage of remaining radioactivity, which corresponds to radioactivity at time t divided by the initial radioactivity measured in the organism at the beginning of the depuration period.
	SHORT-TERM DEPURATION (Remaining activities per individual; %)
Depuration (h)	Acidified condition (pH 7.5)			Control condition (pH 8.0)
	Mn	Co	Zn	Mn	Co	Zn
0	100	100	100	100	100	100
0	100	100	100	100	100	100
0	100	100	100	100	100	100
0	100	100	100	100	100	100
0	100	100	100	100	100	100
0	100	100	100	100	100	100
3	82.5402	63.9625	84.109	85.1386	52.042	77.0534
3	90.2868	60.9376	82.2469	77.9379	55.5266	77.7446
3	84.4182	68.1934	103.008	88.745	74.7094	102.123
3	91.2738	61.7952	94.5228	96.7077	65.4029	103.086
3	88.9022	62.3613	96.2596	82.1195	53.4202	85.095
3	83.021	62.3364	98.2546	84.9394	65.6669	88.9707
6	63.7223	48.3037	79.6027	75.4709	34.6517	74.7339
6	43.1127	24.745	60.3721	52.5436	34.7611	69.2349
6	84.0832	63.3074	112.881	63.2788	56.3615	90.0317
6	68.9697	37.9525	78.5237	58.8624	34.4485	78.6156
6	55.7465	41.9617	80.1355	50.247	33.1214	84.2443
6	53.1784	55.0631	93.1269	52.8966	36.4347	80.1137
9	15.8869	24.9815	33.0888	24.1423	16.0816	44.2254
9	45.7919	31.3416	63.0205	17.1205	22.3528	27.3315
9	18.8613	23.5496	49.857	31.5326	35.0174	63.1395
9	39.5408	27.9546	63.2605	19.9676	29.9864	46.5492
9	24.511	26.8296	46.3838	35.3367	24.5994	59.8946
9	11.4843	29.4116	33.2709	23.0852	21.5171	41.7847
12	6.95285	14.0573	27.7171	11.5082	9.09032	23.1207
12	30.7552	26.9783	53.7726	10.895	9.24404	25.6669
12	10.8418	14.1793	32.9173	13.4207	21.9286	33.5703
12	19.7687	17.8997	50.0311	8.81955	16.2489	30.3664
12	11.1536	13.2314	25.8761	25.9045	20.0878	58.0359
12	9.27389	24.8656	39.1604	16.5249	11.5432	32.4517
24	6.13284	4.3136	17.1161	9.28021	1.78361	20.336
24	8.00726	2.5919	24.1225	11.8635	2.6893	25.9628
24	4.44449	2.35864	22.7054	6.47638	3.83637	18.5327
24	7.46825	2.36004	24.9429	7.96881	3.33713	21.6651
24	9.62465	4.06326	22.1853	5.58337	2.29713	26.4037
24	9.68539	4.18993	24.2875	13.8369	2.88698	27.2059
